# Supplementary material
Source: publisher site journal article supplement (https://www.kjim.org/upload/media/kjim-2022-401-Supplementary-Table-1.pdf)
Supplement: Supplementary file 1 [file kjim-2022-401-Supplementary-Table-1.pdf]

**Supplementary Table 1. Patient characteristics related to transplantation**

| Characteristic                     | Total (n = 43)   | Ph-negative (n = 20) | Ph-positive (n = 23) | <i>p</i> value |
|------------------------------------|------------------|----------------------|----------------------|----------------|
| Age, yr                            | 38 (18–60)       | 32.5 (18–55)         | 49 (18–60)           | 0.002          |
| > 35 years                         | 27 (62.8)        | 8 (40.0)             | 19 (82.6)            |                |
| Sex                                |                  |                      |                      | 0.904          |
| Male                               | 23 (53.5)        | 10 (50.0)            | 13 (56.5)            |                |
| Female                             | 20 (46.5)        | 10 (50.0)            | 10 (43.5)            |                |
| CD20 expression                    | 51.8 (20.9–99.4) | 56.1 (20.9–95.1)     | 48.5 (21–99.4)       | 0.988          |
| Donor                              |                  |                      |                      | 0.759          |
| Matched sibling                    | 10 (23.3)        | 5 (25.0)             | 5 (21.7)             |                |
| Haploidentical                     | 7 (16.3)         | 4 (20.0)             | 3 (13.0)             |                |
| Matched unrelated                  | 26 (60.5)        | 11 (55.5)            | 15 (65.2)            |                |
| Conditioning                       |                  |                      |                      | 0.711          |
| Myeloablative                      | 17 (39.5)        | 9 (45.0)             | 8 (34.8)             |                |
| Non-myeloablative                  | 26 (60.5)        | 11 (55.0)            | 15 (65.2)            |                |
| TBI                                | 7 (16.3)         | 5 (25.0)             | 2 (8.7)              | 0.303          |
| No. of total rituximab             | 6 (2–8)          | 6 (2–8)              | 6 (2–8)              | 0.955          |
| No. of rituximab prior to allo-HCT | 3 (2–8)          | 4 (2–8)              | 3 (2–8)              | 0.542          |
| No. of rituximab after allo-HCT    | 1 (0–3)          | 1 (0–3)              | 2 (0–3)              | 0.442          |

Values are presented as median (range) or number (%).

Ph, Philadelphia; TBI, total body irradiation; allo-HCT, allogeneic hematopoietic cell transplantation.
